# Supplementary material
Source: publisher figshare collection journal article supplement (https://sage.figshare.com/ndownloader/files/24180375)
Supplement: Supplementary file 1 [file 24180375]

**(1) Ethics approval**

 Ethical approval for this study was obtained from \*NAME OF ETHICS COMMITTEE OR INSTITUTIONAL REVIEW BOARD (APPROVAL NUMBER/ID)\*.

**Or** Ethical approval for this study was obtained from the ETHICS COMMITTEE of Shanghai Sixth People's Hospital (YS-2017-003).

Ethical approval for this study was waived by \*NAME OF ETHICS COMMITTEE OR INSTITUTIONAL REVIEW BOARD\* because \*REASON FOR WAIVER\*.

**Or**

Ethical approval was not sought for the present study because \*REASON\*.

**Or**

Not applicable.

**(2) Informed consent**

Written informed consent was obtained from all subjects before the study.

**Or**

Verbal informed consent was obtained from all subjects before the study.

**Or**

Written informed consent was obtained from legally authorized representatives before the study.

**Or**

Verbal informed consent was obtained from legally authorized representatives before the study.

**Or**

 Informed consent was not sought for the present study because \*REASON\*.

**Or** The data were downloaded from the TCGA dataset.

\*OTHER DETAILS\*.

**Or**

Not applicable.

**(3) Trial registration**

\*NAME OF TRIAL REGISTRY: TRIAL REGISTRATION NUMBER\*

**Or**

This randomized clinical trial was not registered because \*REASON\*.

**Or**

 Not applicable.
